# Supplementary material for: Early Years of Carbapenem-Resistant Enterobacterales Epidemic in Abu Dhabi
Source: MDPI journal article supplement (doi:10.3390/antibiotics11101435), 2022-10-19
Supplement: s1 [file s1]

**Table S1.** Characteristics of hospitals providing samples for the study

| Hospitals | Type                     | Size (beds) * | Contribution to the study (%) | Overall coverage rate in the hospital during the study period (%)** |
|-----------|--------------------------|---------------|-------------------------------|---------------------------------------------------------------------|
| A         | Tertiary care            | 450           | 31.2                          | 14.8                                                                |
| B         | Tertiary care            | 550           | 26.9                          | 10.3                                                                |
| C         | Tertiary care            | 450           | 23.9                          | 12.6                                                                |
| D         | Acute care and emergency | 400           | 12.4                          | 12.4                                                                |
| E         | Secondary care           | 200           | 2.5                           | 4.0                                                                 |
| F         | Tertiary care            | 350           | 3.0                           | No data                                                             |

*\*approximate figures \*\*based on figures from 2010 onwards, counting not-repeat isolates, only*

**Table S2.** Rate of antibiotic non-susceptibility, MIC50 and MIC90 values of the 394 CRE isolated between 2009 and 2015

| Antibiotics                   | %     | MIC50  | MIC90 |
|-------------------------------|-------|--------|-------|
|                               |       | (mg/L) |       |
| Ceftazidime                   | 93.9  | >128   | >128  |
| Ceftazidime/Avibactam         | 40.6  | 2      | >128  |
| Cefotaxime                    | 95.9  | >128   | >128  |
| Ertapenem                     | 100.0 | >64    | >64   |
| Imipenem                      | 89.1  | 16     | 128   |
| Meropenem                     | 84.5  | 16     | 64    |
| Aztreonam                     | 89.9  | >128   | >128  |
| Aztreonam/Avibactam           | 4.3   | 0.5    | 1     |
| Ciprofloxacin                 | 92.1  | 64     | >64   |
| Gentamicin                    | 74.6  | 128    | >256  |
| Amikacin                      | 52.3  | 32     | >256  |
| Trimethoprim-Sulfamethoxazole | 85.0  | >256   | >256  |
| Tetracycline                  | 56.6  | 8      | >256  |
| Chloramphenicol               | 75.3  | 64     | >256  |
| Colistin                      | 16.2  | <0.5   | 16    |
| Tigecycline                   | 57.6  | 2      | 4     |
| Fosfomycin                    | 21.3  | 16     | 64    |
